# Supplementary material
Source: Springer Nature journal article supplement (https://www.springermedizin.de/resource/supplementary/12894_2011_199_MOESM6_ESM.pdf/9513266)

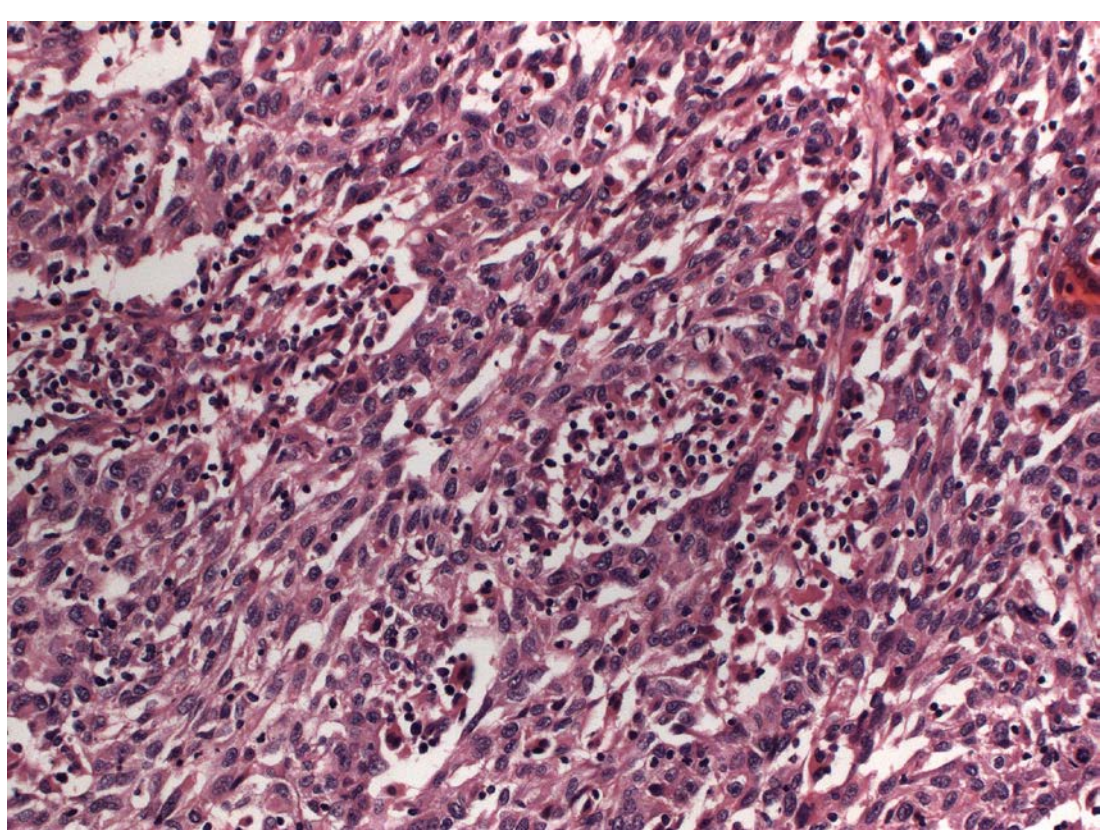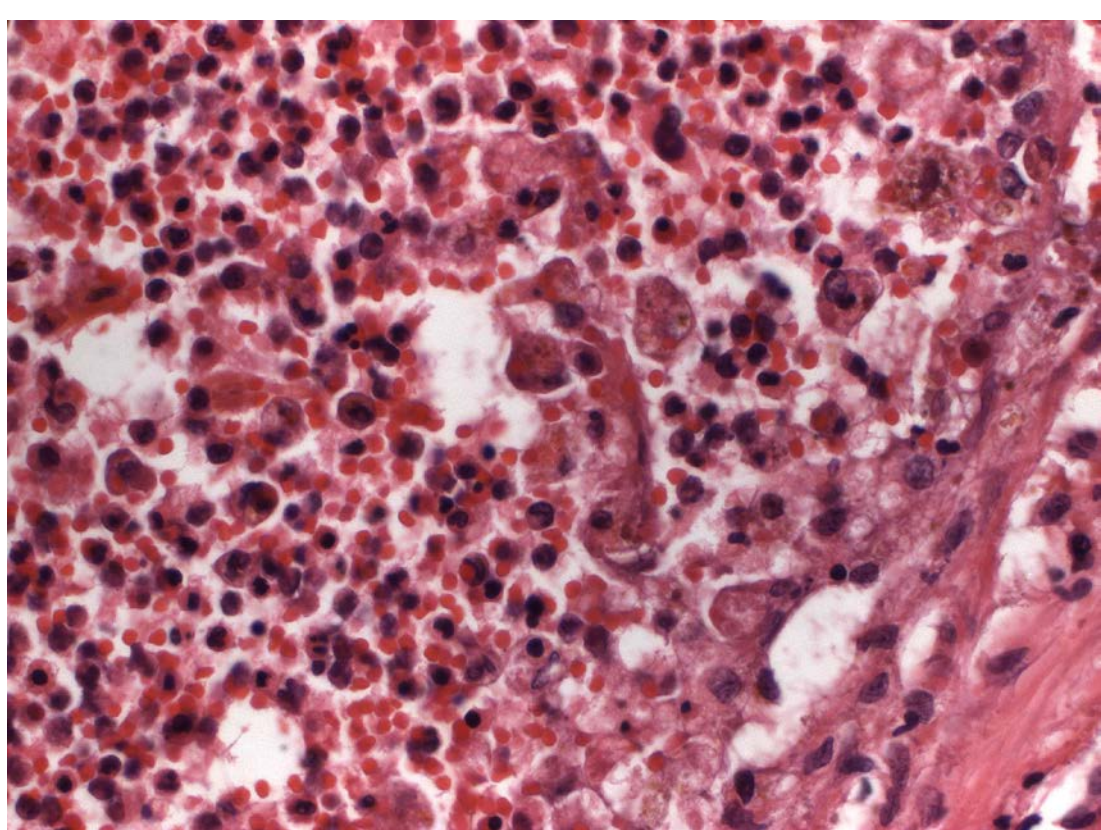

Supplement: MOESM6 [file 9513266]
